# Supplementary material for: Tissue inflammation and nitric oxide-mediated alterations in cardiovascular function are major determinants of endotoxin-induced insulin resistance
Source: PubMed Central journal article supplement (PMC4484635; doi:10.1186/s12933-015-0223-2), 2015-05-20

| Group         | Interleukin- 6 | TNF-a     | PAI-1   |
|---------------|----------------|-----------|---------|
| WT + SAL      | 1.3 ± 0.6      | 1.2 ± 0.4 | 0.6±0.1 |
| WT + LPS      | 8.5 ± 1.3*     | 1.0 ± 0.2 | 0.8±0.2 |
| iNOS KO + SAL | 2.4 ± 1.2      | 2.4 ± 0.6 | 0.9±0.3 |
| iNOS KO + LPS | 11.6 ± 2.7 †   | 1.7 ± 0.4 | 0.8±0.2 |

**Table S1.** Gene expression of pro-inflammatory markers in white adipose tissue of wild type and iNOS knockout mice treated with LPS and after the hyperinsulinemic-euglycemic clamp. \* p<0.05 vs WT+SAL; † p<0.05 vs KO+SAL

## SUPPLEMENTAL FIGURE LEGENDS

**Supplement 1.** Mean arterial blood pressure (MAP in mmHg, Panel A), glucose infusion rate (GIR in  $\text{mg}\cdot\text{kg}^{-1}\cdot\text{min}^{-1}$ , Panel B), and blood glucose (in mg/dL, Panel C) for saline-treated (SAL) or sodium nitroprusside (NO)-treated wild-type (WT;  $\text{iNOS}^{+/+}$ ) mice during experimental induction (infusion) and restoration of hypotension in an extended (180 min) hyperinsulinemic-euglycemic clamp (Group 1A). Mice were treated with IV saline or NO infusion 90 min prior to clamp onset ( $t=0$  min). Infusion was stopped at  $t=90$  min (Reversal). MAP (Panel A) was summarized as mean during infusion period ( $t=0-60$  min) and reversal period ( $t=90-180$ ). Data are expressed as mean  $\pm$  SEM ( $n=2$ ).  $*p \leq 0.05$  vs. WT+SAL compared by  $t$ -test; NS = not significant ( $p \geq 0.05$ ).

**Supplement 2.** Continuous mean arterial blood pressure (MAP) monitoring during infusion of sodium nitroprusside (NO)-infused  $\text{iNOS}^{+/+}$  mice ( Group 1B).

**Supplement 3.** Effects of LPS on skeletal muscle insulin signaling in wild-type (WT;  $\text{iNOS}^{+/+}$ ) and  $\text{iNOS}$  knock-out ( $\text{iNOS}^{-/-}$ ) mice after a 2 h hyperinsulinemic-euglycemic clamp (Group 2A).  $\beta$ -tubulin was used as a loading control. Western blotting was performed for gastrocnemius and vastus lateralis extract for total and tyrosine phosphorylation of IRS1 and Insulin receptor  $\beta$  (IR $\beta$ ).

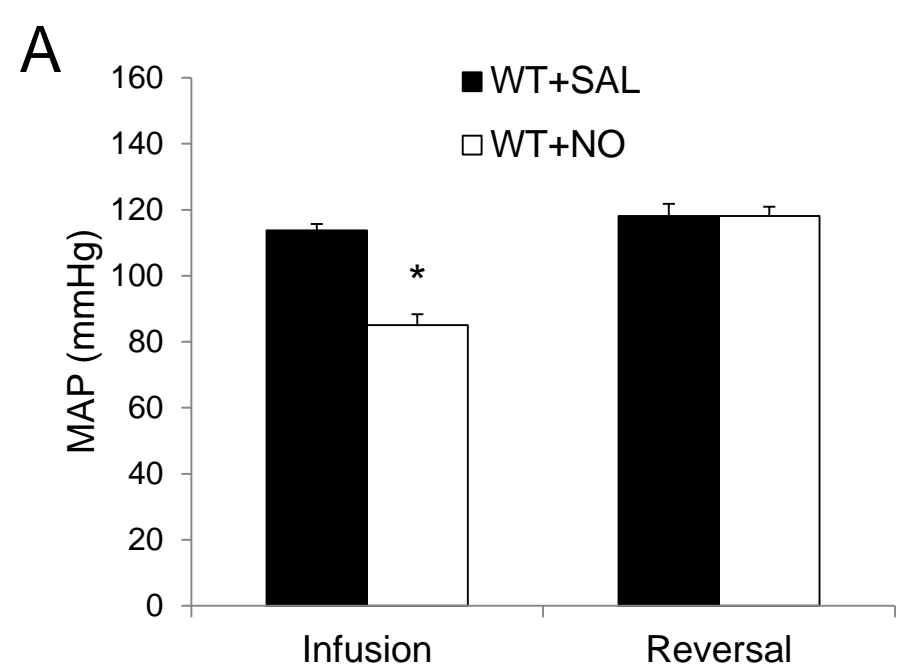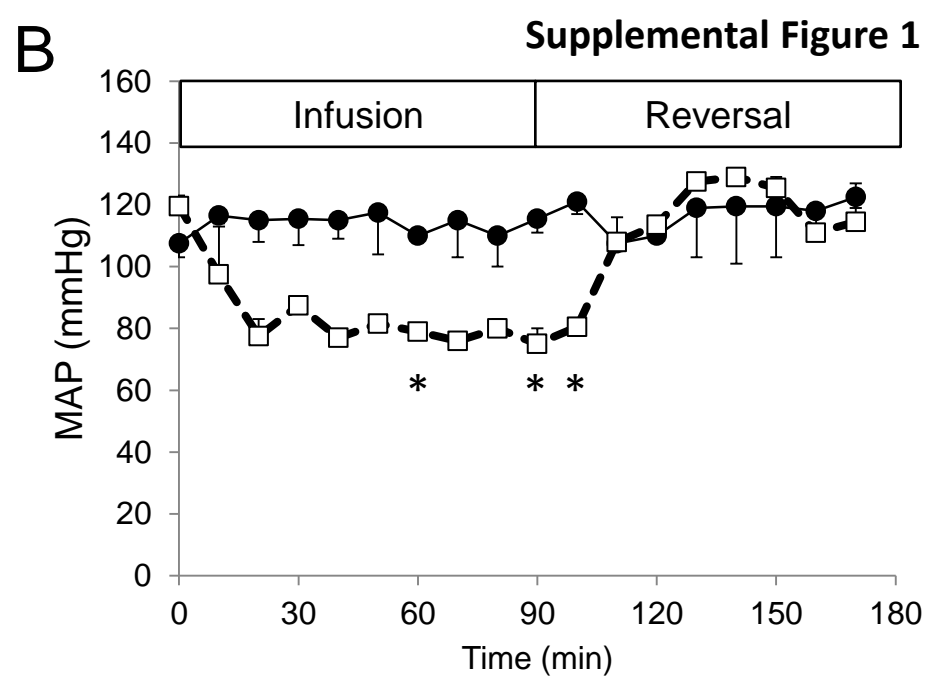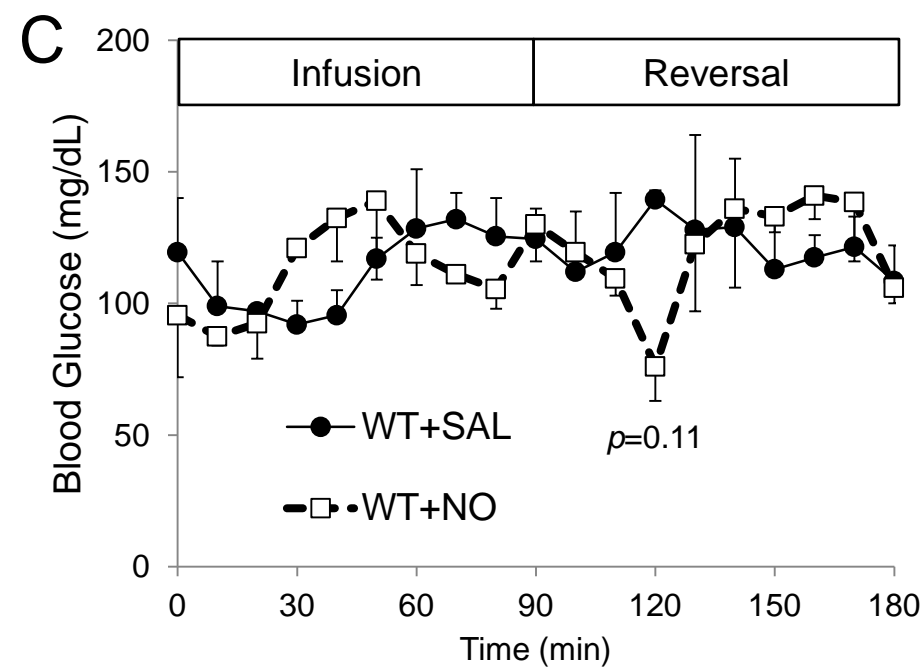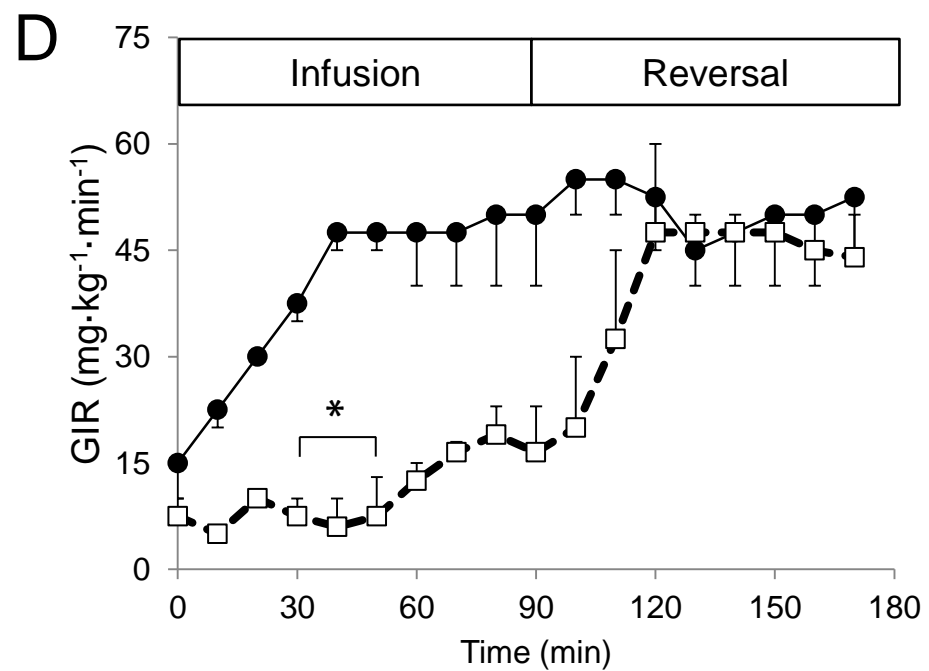

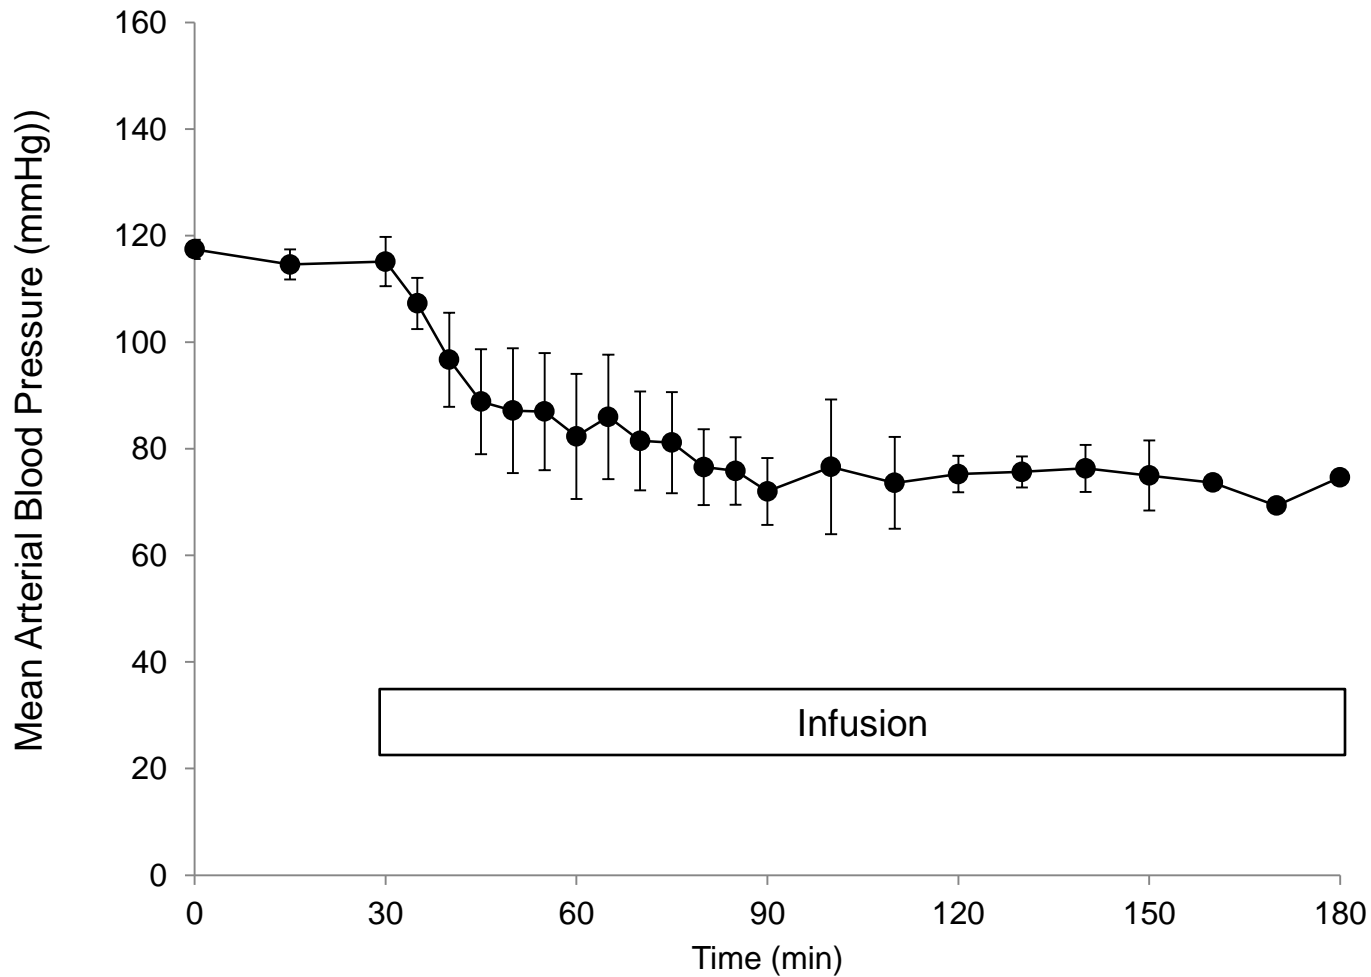

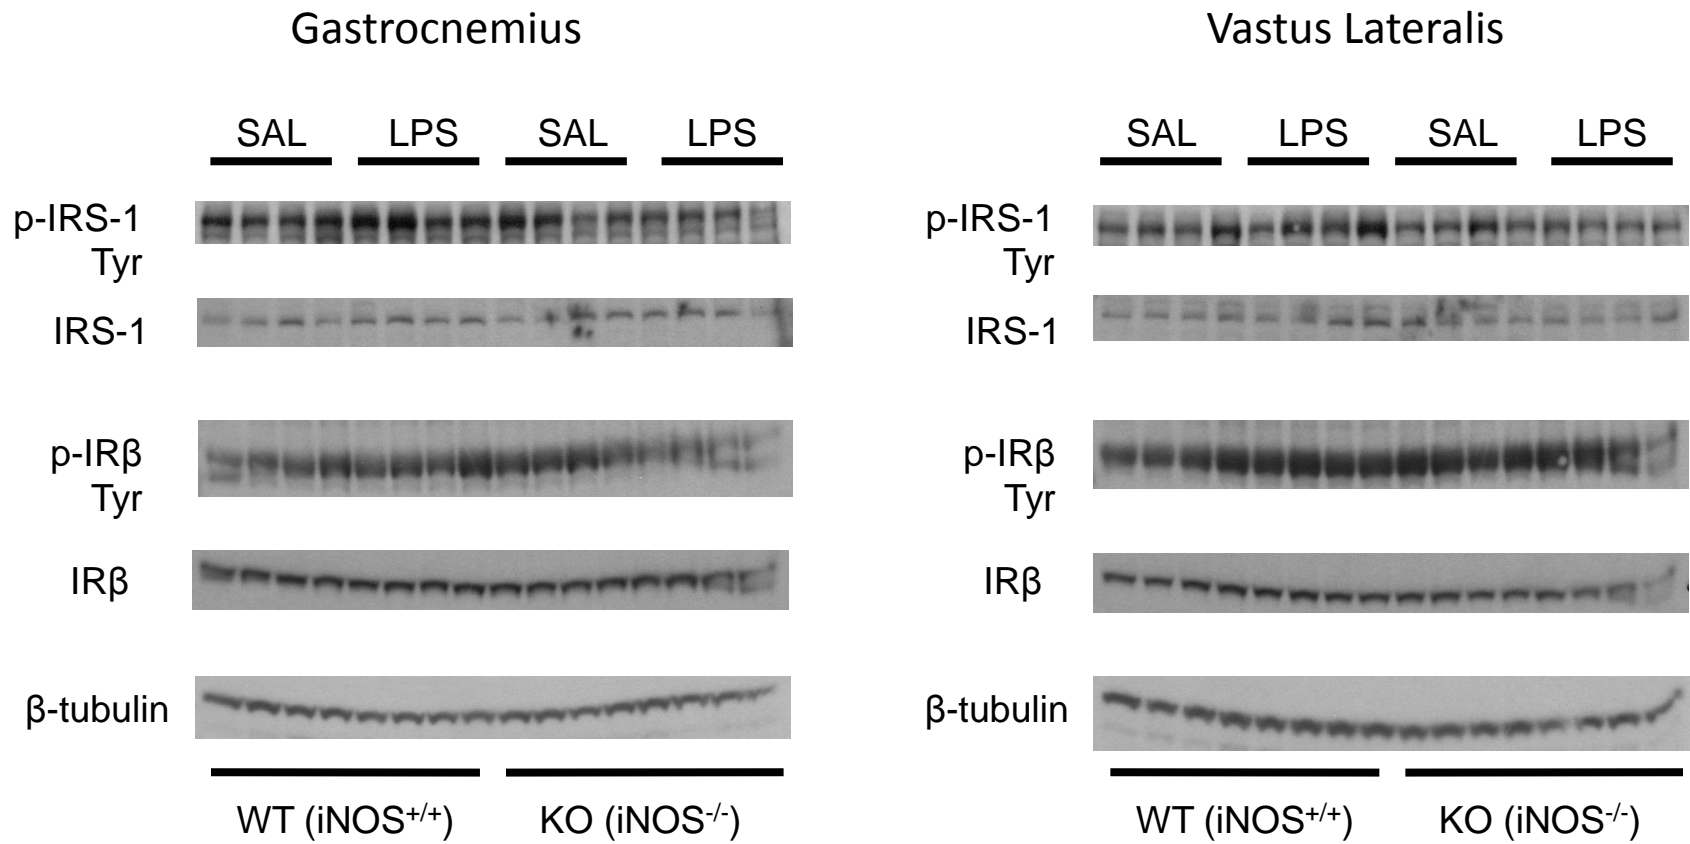

Supplement: 12933_2015_223_MOESM1_ESM.pdf [file 12933_2015_223_MOESM1_ESM.pdf]
